# Supplementary material for: Sobre las licencias para usos y obras provisionales (2ª parte)
Source: Royal Society of Chemistry journal article supplement (doi:10.1039/c8cc00193f), 2009-01-01
Supplement: c8cc00193f1.pdf [file c8cc00193f1.pdf]

## Electronic Supplementary Material

for

# **Yb(AAZTA)(H<sub>2</sub>O)]<sup>-</sup>: an unconventional ParaCEST MRI probe.**

Daniela Delli Castelli,<sup>a</sup> Lorenzo Tei<sup>b</sup>, Fabio Carniato<sup>b</sup>, Silvio Aime<sup>a\*</sup> and Mauro Botta<sup>b\*</sup>

<sup>a</sup> Department of Molecular Biotechnology and Health Sciences, Molecular Imaging Centre, University of Torino, Via Nizza 52, 10126 Torino, Italy. E-mail: [silvio.aime@unito.it](mailto:silvio.aime@unito.it)

<sup>b</sup> Dipartimento di Scienze e Innovazione Tecnologica, Università del Piemonte Orientale “Amedeo Avogadro”, Viale T. Michel 11, I-15121 Alessandria, Italy. E-mail: [mauro.botta@uniupo.it](mailto:mauro.botta@uniupo.it)

**Synthesis of Yb(AAZTA).** The Yb<sup>III</sup>-complex was readily synthesized by adding stoichiometric amounts of aqueous YbCl<sub>3</sub> to a solution of the starting ligand in water at room temperature, maintaining neutral pH by means of 0.1M NaOH. The pH was then increased to nine to precipitate excess Yb<sup>III</sup> as hydroxide. The solution was centrifuged (4000 rpm, 3 min, r.t.) and the supernatant filtered through a 0.2 μm filter. The pH was re-adjusted to 7 and the solvent removed *in vacuo* to obtain a colourless solid. The xylenol orange indicator verified the absence of free Yb<sup>3+</sup>. Electrospray ionization mass spectra (ESI MS) were recorded using a SQD 3100 Mass Detector (Waters), operating in positive or negative ion mode, with 1% v/v formic acid in methanol as the carrier solvent. MS (ESI<sup>-</sup>): m/z: found 530.1 [M]<sup>-</sup>; calcd for C<sub>14</sub>H<sub>19</sub>N<sub>3</sub>O<sub>8</sub>Yb [Yb(AAZTA)]<sup>-</sup>: 530.4 [M]<sup>-</sup>.

**Relaxometric measurements.** The water proton longitudinal relaxation rates of aqueous solutions were measured at 298 K by using a Stellar Spinmaster Relaxometer equipped with a Bruker WP80 NMR electromagnet adapted to variable-field measurements operating in the range of 20–70 MHz. The standard inversion–recovery method was employed (16 experiments, 2 scans) with a typical 90° pulse width of 3.5 μs, and the reproducibility of the T<sub>1</sub> data was ± 0.5%. The temperature was controlled using a Stellar VTC-91 variable temperature unit equipped with a copper-constantan thermocouple (uncertainty of ± 0.1 °C). The concentration of the Yb<sup>III</sup> and Dy<sup>III</sup>-chelates was determined by <sup>1</sup>H-NMR (500 MHz) measurements using Evans's method (D. F. Evans, G. V. Fazakerley, R. F. Phillips. J. Chem. Soc. (A), 1971, 1931-1934)

**<sup>1</sup>H NMR Measurements.** [Yb(AAZTA)]<sup>-</sup> was dissolved either in D<sub>2</sub>O or in H<sub>2</sub>O, and the pH was adjusted to 7.0 by addition of HCl or KOH and checked with a glass electrode connected to a pH-meter. The spectra were recorded at 14.1 T on a Bruker Avance 600 spectrometer. The temperature was controlled with Bruker thermostating units.

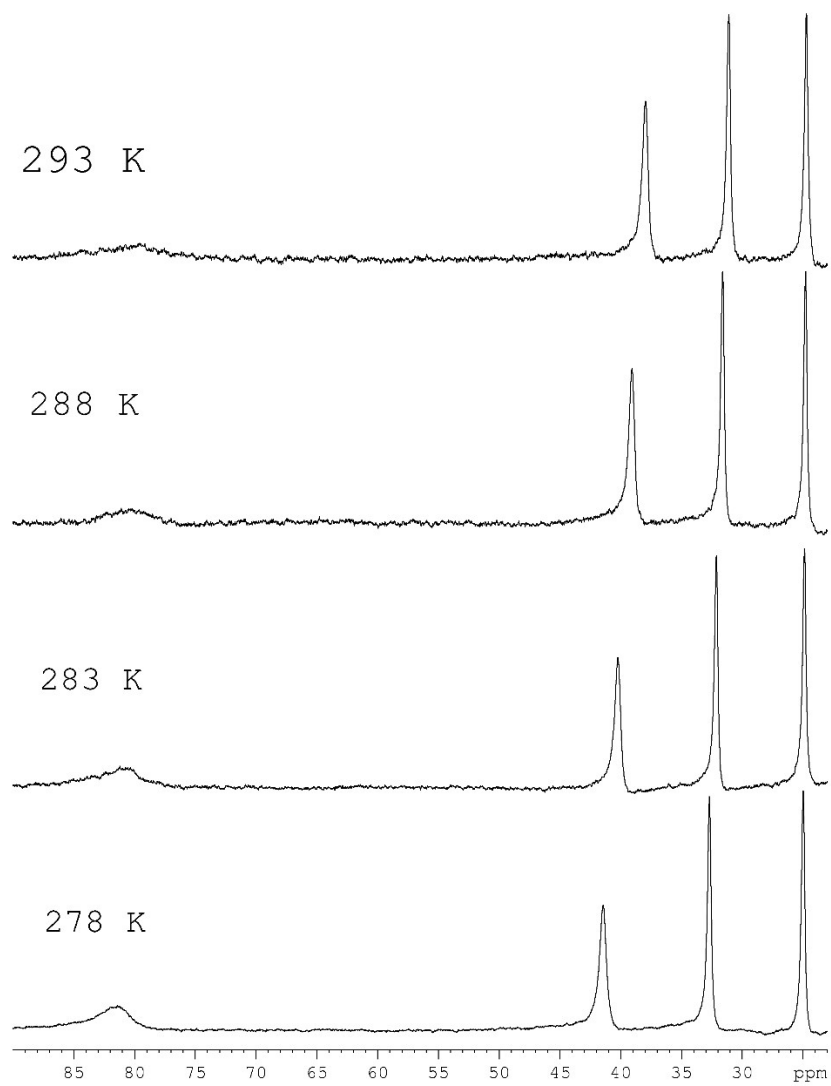

**Figure S1:** 14.1 T Variable Temperature  $^1\text{H}$  NMR spectra (high field region) of a solution 20 mM of  $[\text{Yb}(\text{AAZTA})(\text{H}_2\text{O})]^-$  in water.

## CEST Measurements

Z-spectra were acquired at 7T on a Bruker Avance 300 spectrometer equipped with a micro-imaging probe. A frequency-offset range of  $\pm 200$  ppm was investigated. A typical RARE spin-echo sequence RARE factor=32 with an echo time of 3 ms and a TR value of 5 s was used. An isotropic  $64 \times 64$  acquisition matrix with a FOV of 10 mm and a slice thickness of 1mm were used. The whole sequence was preceded by a saturation scheme consisting of a continuous rectangular wave pulse 1 s long with a radiofrequency  $B_2$  intensity of  $48 \mu\text{T}$ . The Z-spectra were interpolated by smoothing splines to identify the zero-offset on a pixel-by-pixel basis of the bulk water and, then, to assess the correct ST% value over the entire range of frequency offsets investigated. Custom-made software, compiled in the Matlab platform (Mathworks Inc., Natick, MA), was used (Stancanello J, Terreno E, Castelli DD, Cabella C, Uggeri F, Aime S. *Contrast Media Mol Imaging*. 2008,4:136-49). The extent of the CEST effect was obtained by comparing the two water signal intensities obtained upon irradiation at  $\Delta\omega$  and  $-\Delta\omega$  values (bulk water assigned to zero):

$$\text{ST}\% = 1 - \frac{\text{MS}(\Delta\omega)}{\text{MS}(-\Delta\omega)}$$

in which MS refers to the water MR signal intensity.
